# Supplementary material
Source: PubMed Central journal article supplement (PMC4015243)
Supplement: mt201422x1.pdf [file mt201422x1.pdf]

**Supplementary Table 1: G207 Steroid Status of Subjects**

| <b>Subject #</b> | <b>Steroid</b>                       | <b>Daily Dose</b>                   | <b>Start Date</b>              | <b>End Date</b>               | <b>Screen Date</b> | <b>G207 Administration</b> |
|------------------|--------------------------------------|-------------------------------------|--------------------------------|-------------------------------|--------------------|----------------------------|
| 111              | Decadron                             | 18 mg PO<br>24 mg IV                | 2/23/04<br>5/24/05             | Ongoing<br>5/27/05            | 5/11/05            | 5/24/05                    |
| 112              | Prednisone                           | 120 mg<br>PO                        | 11/15/04                       | Ongoing                       | 8/15/05            | 8/18/05                    |
| 113              | Prednisone<br>Decadron<br>Decadron   | 50 mg PO<br>4 mg IV<br>16 mg PO     | 11/16/05<br>8/25/05<br>8/27/05 | Ongoing<br>8/26/05<br>Ongoing | 8/15/05            | 8/25/05                    |
| 114              | Decadron<br>Decadron                 | 32 mg PO<br>4 mg IV                 | 2/14/05<br>12/1/05             | Ongoing?<br>12/4/05           | 11/8/05            | 12/1/05                    |
| 115              | Decadron                             | 12 mg PO                            | 11/1/05                        | Ongoing                       | 11/16/05           | 12/1/05                    |
| 116              | Decadron                             | 4 mg PO                             | 5/NK/05                        | Ongoing                       | 4/12/06            | 4/20/06                    |
| 117              | No steroids recorded                 | NA                                  | NA                             | NA                            | 7/3/06             | 7/13/06                    |
| 118              | Decadron                             | 36 mg PO                            | 2/16/05                        | Ongoing                       | 9/25/06            | 9/28/06                    |
| 119              | Decadron<br>Prednisone<br>Prednisone | 4 mg PO<br>130 mg<br>PO<br>30 mg PO | 6/2/07<br>7/20/07<br>7/23/07   | 7/19/07<br>7/23/07<br>8/NK/07 | 7/16/07            | 7/19/07                    |
