# Supplementary material
Source: PubMed Central journal article supplement (PMC4015243)
Supplement: mt201422x2.pdf [file mt201422x2.pdf]

**Supplementary Table 2.**

| <b>Pt</b> | <b>Adverse Events</b>             | <b>Serious</b> | <b>SEV</b> | <b>Caused by G207</b> | <b>Outcome</b>          |
|-----------|-----------------------------------|----------------|------------|-----------------------|-------------------------|
| 111       | Indigestion                       | 0              | 1          | Not Related           | Fully Recovered         |
|           | Left Upper Extremity Pain         | 0              | 2          | Not Related           | Fully Recovered         |
|           | Headache                          | 3              | 3          | Unlikely              | Fully Recovered         |
|           | Tumor Progression                 | 4              | 3          | Not Related           | Fatal                   |
|           | Fall                              | 0              | 1          | Not Related           | Fully Recovered         |
|           | Ligament instability Left Ankle   | 0              | 1          | Not Related           | Ongoing                 |
|           | Headache                          | 0              | 2          | Not Related           | Ongoing                 |
|           | Ecchymosis on Upper Extremities   | 0              | 1          | Not Related           | Ongoing                 |
|           | Left Neglect                      | 0              | 2          | Not Related           | Ongoing                 |
|           | Left Dysmetria                    | 0              | 2          | Not Related           | Ongoing                 |
|           | Left Hemiparesis                  | 0              | 2          | Not Related           | Ongoing                 |
|           | Perianal Itching                  | 0              | 1          | Not Related           | Fully Recovered         |
|           | Left Facial Assymetry             | 0              | 2          | Not Related           | Ongoing                 |
| 112       | Rash                              | 0              | 1          | Not Related           | Fully Recovered         |
|           | Anisocoria                        | 0              | 1          | Not Related           | Ongoing                 |
|           | Focal Seizures                    | 0              | 2          | Not Related           | Ongoing                 |
|           | Dizziness                         | 0              | 1          | Not Related           | Recovered with Sequelae |
|           | Headache                          | 0              | 1          | Not Related           | Recovered with Sequelae |
|           | INC Right sided weakness          | 0              | 1          | Not Related           | Ongoing                 |
|           | Temperature 100.5                 | 0              | 1          | Not Related           | Fully Recovered         |
|           | Headache                          | 0              | 1          | Not Related           | Fully Recovered         |
|           | Dysphasia                         | 0              | 2          | Not Related           | Ongoing                 |
|           | Irritability                      | 0              | 1          | Not Related           | Ongoing                 |
|           | Fall                              | 0              | 1          | Not Related           | Fully Recovered         |
|           | Triceps Tendon Tear               | 0              | 2          | Not Related           | Ongoing                 |
|           | Seizure                           | 3              | 3          | Possible              | Recovered with Sequelae |
|           | Tumor Progression                 | 1              | 3          | Not Related           | Fatal                   |
| 113       | Seizure                           | 3              | 3          | Not Related           | Fully Recovered         |
|           | Fever 38.5                        | 0              | 1          | Not Related           | Fully Recovered         |
|           | Premature Ventricular Contraction | 0              | 2          | Not Related           | Fully Recovered         |

|     |                                 |   |   |             |                         |
|-----|---------------------------------|---|---|-------------|-------------------------|
|     | Frequent Urination              | 0 | 1 | Not Related | Ongoing                 |
|     | Urinary Tract Infection         | 0 | 1 | Not Related | Fully Recovered         |
|     | Sinus Headache                  | 0 | 1 | Not Related | Fully Recovered         |
|     | Hyperglycemia                   | 0 | 1 | Not Related | Ongoing                 |
|     | Dizziness                       | 0 | 2 | Not Related | Ongoing                 |
|     |                                 |   |   |             |                         |
| 114 | Temp fever                      | 3 | 3 | Probable    | Fully Recovered         |
|     | Seizure                         | 3 | 3 | Possible    | Fully Recovered         |
|     | Mouth Sore                      | 0 | 1 | Not Related | Fully Recovered         |
|     | Headache                        | 0 | 2 | Not Related | Fully Recovered         |
|     | Fatigue                         | 0 | 2 | Not Related | Ongoing                 |
|     | Hallucinations                  | 0 | 3 | Not Related | Fully Recovered         |
|     | Fall                            | 0 | 2 | Not Related | Recovered with sequelae |
|     | Visual Field Deficit            | 0 | 1 | Not Related | Ongoing                 |
|     | Hyponatremia                    | 0 | 1 | Not Related | Fully Recovered         |
|     | Headache                        | 0 | 1 | Not Related | Ongoing                 |
|     | Dizziness                       | 0 | 2 | Not Related | Ongoing                 |
|     | Tumor Progression               | 1 | 3 | Not Related | Fatal                   |
|     |                                 |   |   |             |                         |
| 115 | Meningitis                      | 3 | 2 | Not Related | Fully Recovered         |
|     | CSF Leak                        | 3 | 3 | Not Related | Fully Recovered         |
|     | Balance Difficulties            | 0 | 3 | Not Related | Ongoing                 |
|     | Staring Spells                  | 0 | 2 | Not Related | Ongoing                 |
|     | Increased Sleepiness            | 0 | 2 | Not Related | Ongoing                 |
|     | Lethargy/Weakness               | 3 | 3 | Not Related | Recovered with Sequelae |
|     | Urosepsis                       | 1 | 3 | Not Related | Fatal                   |
|     | Tumor Progression               | 1 | 3 | Not Related | Fatal                   |
|     |                                 |   |   |             |                         |
| 116 | Headache                        | 0 | 2 | Not Related | Ongoing                 |
|     | Problem with Balance            | 0 | 1 | Not Related | Ongoing                 |
|     | Worsening function of left hand | 0 | 2 | Not Related | Ongoing                 |
|     | Nausea                          | 0 | 1 | Not Related | Fully Recovered         |
|     | Seizure                         | 0 | 2 | Not Related | Ongoing                 |
|     | Short term memory loss          | 0 | 2 | Not Related | Ongoing                 |
|     | Tumor Progression               | 1 | 3 | Not Related | Fatal                   |
|     |                                 |   |   |             |                         |
| 117 | Nausea Vomitting                | 0 | 2 | Unlikely    | Fully Recovered         |
|     | Fever                           | 0 | 1 | Unlikely    | Fully Recovered         |
|     | Fatigue                         | 0 | 1 | Unlikely    | Ongoing                 |

|     |                                       |   |   |             |                            |
|-----|---------------------------------------|---|---|-------------|----------------------------|
|     | Mouth Sore                            | 0 | 1 | Unlikely    | Fully Recovered            |
|     | Intermittent Headache                 | 0 | 1 | Unlikely    | Ongoing                    |
|     | Intermittent Nausea                   | 0 | 1 | Not Related | Ongoing                    |
|     | Tumor Progression                     | 1 | 3 | Not Related | Fatal                      |
|     |                                       |   |   |             |                            |
| 118 | Pitting Edema                         | 0 | 1 | Not Related | Ongoing                    |
|     | Scattered Rhonchi                     | 0 | 1 | Not Related | Ongoing                    |
|     | Confusion                             | 0 | 1 | Not Related | Ongoing                    |
|     | Headache                              | 0 | 2 | Not Related | Ongoing                    |
|     | Nausea                                | 0 | 2 | Not Related | Fully Recovered            |
|     | Agitation                             | 0 | 2 | Not Related | Fully Recovered            |
|     | Acute Hypoxia                         | 0 | 2 | Not Related | Fully Recovered            |
|     | Dyspnea                               | 0 | 3 | Not Related | Fully Recovered            |
|     | Heartrate 170<br>Tachycardia          | 0 | 3 | Not Related | Fully Recovered            |
|     | Hypoglycemia                          | 0 | 3 | Not Related | Ongoing                    |
|     | Pneumonia                             | 0 | 2 | Not Related | Ongoing                    |
|     | Abdominal Distended                   | 0 | 3 | Not Related | Ongoing                    |
|     | Skin Rash                             | 0 | 1 | Not Related | Ongoing                    |
|     | Increased Left sided<br>weakness      | 3 | 3 | Not Related | Ongoing                    |
|     | Insomnia                              | 0 | 2 | Not Related | Ongoing                    |
|     | Worsening<br>Hemiparesis L side       | 3 | 2 | Unlikely    | Ongoing                    |
|     | Cardiac Arrythmia                     | 3 | 3 | Unlikely    | Fully Recovered            |
|     | Tumor Progression                     | 1 | 3 | Not Related | Fatal                      |
|     |                                       |   |   |             |                            |
| 119 | Seizure                               | 0 | 2 | Not Related | Recovered with<br>sequelae |
|     | fever                                 | 0 | 1 | Unlikely    | Fully Recovered            |
|     | Todds Paralysis                       | 0 | 1 | Not Related | Fully Recovered            |
|     | Decreased Right Hand<br>strength      | 0 | 2 | Not Related | Recovered with<br>sequelae |
|     | Unsteady Gait                         | 0 | 1 | Not Related | Fully Recovered            |
|     | Twitching of fingers on<br>Right Hand | 0 | 1 | Not Related | Fully Recovered            |
|     | Worsening of Vision                   | 0 | 1 | Not Related | Fully Recovered            |
|     | Bruising of Right<br>Forearm          | 0 | 1 | Not Related | Fully Recovered            |
|     | Anger                                 | 0 | 1 | Not Related | Fully Recovered            |
|     | Difficulty<br>Comprehending           | 0 | 1 | Not Related | Fully Recovered            |
|     | Rash (Steroid Rash)                   | 0 | 2 | Not Related | Fully Recovered            |
|     | Joint Pains Shoulders                 | 0 | 2 | Not Related | Fully Recovered            |

|  |                                     |   |   |             |                 |
|--|-------------------------------------|---|---|-------------|-----------------|
|  | and Knees Bilat                     |   |   |             |                 |
|  | Mild Acne                           | 0 | 1 | Not Related | Ongoing         |
|  | Cushingoid Secondary to Steroid Use | 0 | 1 | Not Related | Ongoing         |
|  | Positive Right Hoffman's SIGN       | 0 | 1 | Not Related | Ongoing         |
|  | Baseline Esotropia                  | 0 | 1 | Not Related | Ongoing         |
|  | Elevated Glucose Serum              | 0 | 1 | Not Related | Ongoing         |
|  | Urine positive for glucose          | 0 | 1 | Not Related | Ongoing         |
|  | Aura                                | 0 | 1 | Not Related | Fully Recovered |
|  | Depression                          | 0 | 1 | Not Related | Ongoing         |
