# Supplementary material
Source: PubMed Central journal article supplement (PMC4015243)
Supplement: mt201422x3.pdf [file mt201422x3.pdf]

### Supplementary Table 3.

| Patient                                                             | Best response | Time to progression (days) | Survival (Days) | Notes                                               |
|---------------------------------------------------------------------|---------------|----------------------------|-----------------|-----------------------------------------------------|
| 111                                                                 | SD            | 92                         | 158             |                                                     |
| 112                                                                 | SD            | 174                        | 297             |                                                     |
| 113                                                                 | SD            | 172                        | 385             | later compassionate use                             |
| 114                                                                 | PD            | 34                         | 91              |                                                     |
| 115                                                                 | SD            | 70                         | 70              | died from urosepsis, no confirmation of progression |
| 116                                                                 | SD            | 74                         | 529             |                                                     |
| 117                                                                 | PD            | 34                         | 228             |                                                     |
| 118                                                                 | PD            | 46                         | 46              | patient's family declined to bring back to visit    |
| 119                                                                 | PR            | 344                        | 559             | later compassionate use                             |
| PD= progressive disease, SD = stable disease, PR = partial response |               |                            |                 |                                                     |
