# Supplementary material
Source: PubMed Central journal article supplement (PMC4015243)
Supplement: mt201422x4.pdf [file mt201422x4.pdf]

### Supplementary Table 4. CD 4 and CD 8 Counts

*Abbreviations:* NA: Not Available; V2D2: Visit 2 Day 2; V2D4: Visit 2 Day 4; V3: Visit 3 Day 28; V3: Visit 3 Day 28; V4: Visit 4 month 3

| Patient ID | CD 4                    |               |               |                |                 | CD 8                    |              |             |                |                 |
|------------|-------------------------|---------------|---------------|----------------|-----------------|-------------------------|--------------|-------------|----------------|-----------------|
|            | Screening               | Day 2         | Day 4         | Visit 3 Day 28 | Visit 4 Month 3 | Screening               | Day 2        | Day 4       | Visit 3 Day 28 | Visit 4 Month 3 |
| 111        | 446                     | 57            | 409           | 277            | 421             | 510                     | 148          | 418         | 470            | 551             |
| 112        | 134                     | 289           | 92            | 266            | NA              | 170                     | 215          | 162         | 258            | NA              |
| 113        | 178                     | NA            | NA            | 149            | NA              | 64                      | NA           | NA          | 81             | NA              |
| 114        | NA                      | NA            | 367           | NA             | NA              | NA                      | NA           | 144         | NA             | NA              |
| 115        | NA                      | 56            | 66            | NA             | NA              | NA                      | 115          | 147         | NA             | NA              |
| 116        | 176                     | 121           | 192           | 176            | NA              | 158                     | 88           | 157         | 157            | NA              |
| 117        | NA                      | NA            | 317           | 540            | NA              | NA                      | NA           | 274         | 497            | NA              |
| 118        | NA                      | 380           | 1201          | NA             | NA              | NA                      | 226          | 503         | NA             | NA              |
| 119        | 233                     | 77            | 101           | 360            | 111             | 226                     | 131          | 115         | 238            | 130             |
|            | Summary Statistics CD 4 |               |               |                |                 | Summary Statistics CD 8 |              |             |                |                 |
|            | Screening               | Day 2         | Day 4         | Visit 3 Day 28 | Visit 4 Month 3 | Screening               | Day 2        | Day 4       | Visit 3 Day 28 | Visit 4 Month 3 |
| Median     | 178                     | 99            | 254.5         | 271.5          | 266             | 170                     | 139.5        | 159.5       | 248            | 340.5           |
| Mean (SD)  | 233.4 (123.9)           | 163.3 (137.7) | 343.1 (370.9) | 294.7 (142.1)  | 266 (219.2)     | 225.6 (169.3)           | 153.8 (55.4) | 240 (145.6) | 283.5 (167.4)  | 340.5 (297.7)   |
| Range      | 134-446                 | 56-380        | 66-1201       | 149-540        | 111-421         | 64-510                  | 88-226       | 115-503     | 81-497         | 130-551         |
