# Supplementary material
Source: PubMed Central journal article supplement (PMC4015243)
Supplement: mt201422x5.pdf [file mt201422x5.pdf]

### Supplementary Table 5. HSV Serostatus

Abbreviations: Ab: Antibody; Pos: Positive; Neg: Negative; NA: Not available

| Patient ID                                 | Screening |          | Visit 3 Day 28 |          |
|--------------------------------------------|-----------|----------|----------------|----------|
|                                            | HSV-1 Ab  | HSV-2 Ab | HSV-1 Ab       | HSV-2 Ab |
| 111                                        | Neg       | Neg      | Neg            | Neg      |
| 112                                        | Pos       | Neg      | Pos            | Neg      |
| 113                                        | Neg       | Neg      | Pos            | Neg      |
| 114                                        | Pos       | Neg      | NA             | NA       |
| 115                                        | Neg       | Neg      | NA             | NA       |
| 116                                        | Neg       | Neg      | Neg            | Neg      |
| 117                                        | Pos       | Neg      | NA             | NA       |
| 118                                        | Neg       | Neg      | NA             | NA       |
| 119                                        | Neg       | Neg      | Neg            | NA       |
| Summary<br>HSV<br>Serostatus<br>Statistics | Screening |          | Visit 3 Day 28 |          |
|                                            | HSV-1 Ab  | HSV-2 Ab | HSV-1 Ab       | HSV-2 Ab |
| Pos (n)                                    | 3         | 0        | 2              | 0        |
| Neg (n)                                    | 6         | 9        | 3              | 4        |
| NA (n)                                     | 0         | 0        | 4              | 5        |
