# Supplementary material
Source: PubMed Central journal article supplement (PMC4015243)
Supplement: mt201422x6.pdf [file mt201422x6.pdf]

**Supplementary Table 6.**

| Compassionate use patient | Time, Initial G207 inoculation/radiation until retreatment (mos) | Time, second G207 inoculation/radiation until death (mos) | Time, initial G207 inoculation/radiation until death (mos) |
|---------------------------|------------------------------------------------------------------|-----------------------------------------------------------|------------------------------------------------------------|
| 113                       | 7.4                                                              | 5.4                                                       | 12.8                                                       |
| 119                       | 10.4                                                             | 8.2                                                       | 18.6                                                       |
